# Supplementary material
Source: PubMed Central journal article supplement (PMC4894002)

**Supplemental Figure 1.** Overview of the 438 initiated in vitro fertilization cycles in the Environmental and Reproductive Health (EARTH) Study. Abbreviations: SAB, spontaneous abortion; SB, stillbirth; TAB, therapeutic abortion; IUI, intrauterine insemination; IVF, in vitro fertilization.

**Supplemental Figure 2.** Association between whole grains and in vitro fertilization (IVF) outcomes in 259 women (399 IVF cycles) with embryo transfer in the Environment and Reproductive Health (EARTH) Study. All analyses were conducted using generalized linear mixed models with random intercepts, binomial distribution, and logit link function. Data are presented as marginal mean probabilities adjusted for calorie intake, age, BMI, race, dietary

patterns, and folate and alcohol intake. \* indicates that the p-value for the comparison vs. Q1 was  $<0.05$

**Supplemental Table 1.** Distribution of whole grain, bran, and germ in 273 women (with 283 FFQs) in the in the Environment and Reproductive Health (EARTH) Study.

| <b>Nutrient</b>                   | <b>Value, g/day</b> |           |               |           |            |
|-----------------------------------|---------------------|-----------|---------------|-----------|------------|
|                                   | <b>Min</b>          | <b>Q1</b> | <b>Median</b> | <b>Q3</b> | <b>Max</b> |
| Whole Grain                       | 0.6                 | 21.6      | 34.2          | 52.6      | 195.6      |
| Whole Grain without added sources | 0.6                 | 18.8      | 29.9          | 46.3      | 171.2      |
| Total Bran                        | 0.03                | 4.43      | 7.81          | 14.14     | 70.28      |
| Bran in food                      | 0.03                | 2.83      | 4.73          | 7.62      | 46.04      |
| Bran added to food                | 0.00                | 1.28      | 2.74          | 5.82      | 31.6       |
| Total Germ                        | 0.07                | 0.92      | 1.52          | 2.24      | 7.88       |
| Germ in food                      | 0.07                | 0.81      | 1.27          | 2.00      | 7.75       |
| Germ added to food                | 0.00                | 0.01      | 0.06          | 0.17      | 6.64       |

**Supplemental Table 2.** Association between bran, germ, and fiber intake and clinical outcomes of in vitro fertilization (IVF) in 273 women (438 IVF cycles) in Environment and Reproductive Health (EARTH).

| <b>Adjusted Mean Probabilities (95% CI)<sup>a</sup></b> | <b>Implantation</b> | <b>Clinical Pregnancy</b> | <b>Live Birth</b>  |
|---------------------------------------------------------|---------------------|---------------------------|--------------------|
| <b>Bran Intake, g/day</b>                               |                     |                           |                    |
| Q1 (<4.4)                                               | 0.45 (0.34, 0.55)   | 0.43 (0.33, 0.53)         | 0.33 (0.24, 0.43)  |
| Q2 (4.4-7.7)                                            | 0.54 (0.44, 0.64)   | 0.44 (0.35, 0.54)         | 0.34 (0.25, 0.44)  |
| Q3 (7.8-14.1)                                           | 0.62 (0.52, 0.71)*  | 0.57 (0.47, 0.67)         | 0.45 (0.35, 0.55)  |
| Q4 (>14.1)                                              | 0.70 (0.59, 0.79)*  | 0.63 (0.51, 0.73)*        | 0.53 (0.42, 0.65)* |
| P trend                                                 | 0.003               | 0.008                     | 0.006              |
| <b>Germ Intake, g/day</b>                               |                     |                           |                    |
| Q1 (<0.9)                                               | 0.57 (0.45, 0.68)   | 0.54 (0.42, 0.65)         | 0.40 (0.29, 0.52)  |
| Q2 (0.9-1.5)                                            | 0.57 (0.47, 0.67)   | 0.49 (0.39, 0.59)         | 0.37 (0.28, 0.47)  |
| Q3 (1.6-2.2)                                            | 0.52 (0.41, 0.62)   | 0.47 (0.37, 0.58)         | 0.39 (0.29, 0.50)  |
| Q4 (>2.2)                                               | 0.64 (0.52, 0.75)   | 0.57 (0.45, 0.68)         | 0.48 (0.37, 0.60)  |
| P trend                                                 | 0.36                | 0.52                      | 0.24               |
| <b>Total Fiber Intake, g/day</b>                        |                     |                           |                    |
| Q1 (<15.2)                                              | 0.52 (0.39, 0.65)   | 0.45 (0.33, 0.58)         | 0.34 (0.23, 0.47)  |
| Q2 (15.2-20.1)                                          | 0.53 (0.42, 0.64)   | 0.45 (0.35, 0.56)         | 0.36 (0.27, 0.47)  |
| Q3 (20.2-26.3)                                          | 0.59 (0.48, 0.69)   | 0.55 (0.44, 0.65)         | 0.43 (0.33, 0.54)  |
| Q4 (>26.3)                                              | 0.66 (0.51, 0.78)   | 0.62 (0.46, 0.74)         | 0.51 (0.36, 0.66)  |
| P trend                                                 | 0.22                | 0.15                      | 0.13               |

<sup>a</sup>All analyses were conducted using generalized linear mixed models with random intercepts, binomial distribution, and logit link function. Data are presented as marginal mean probabilities adjusted for calorie intake, age, BMI, race, dietary patterns, and folate and alcohol intake.

\*indicates that the p-value for the comparison vs. Q1 was <0.05.

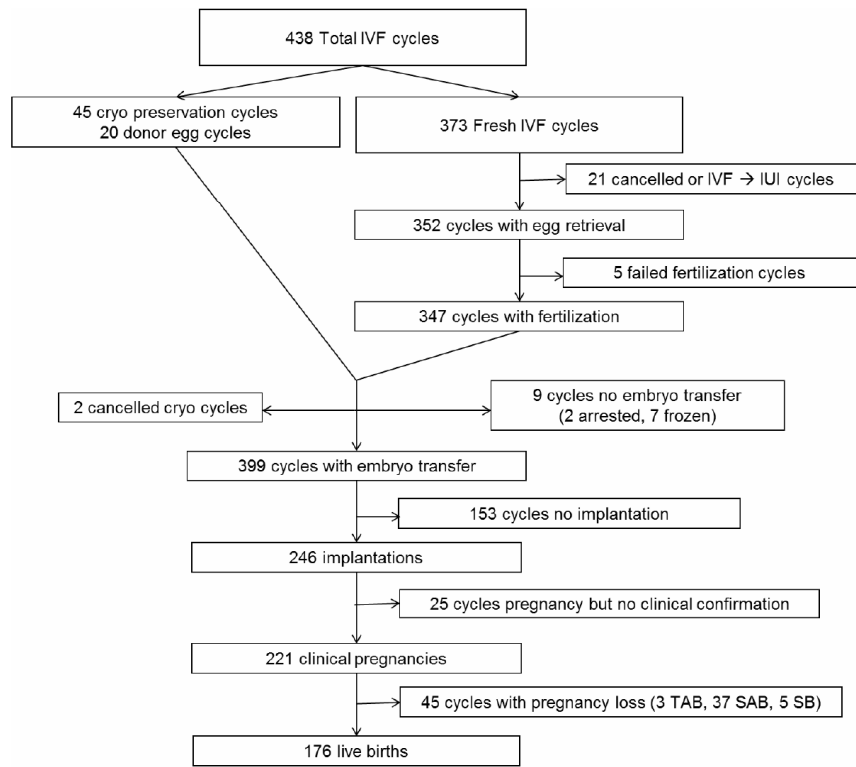

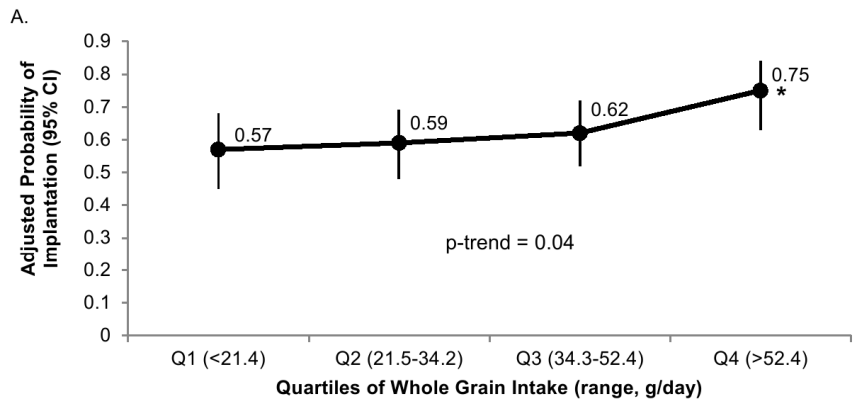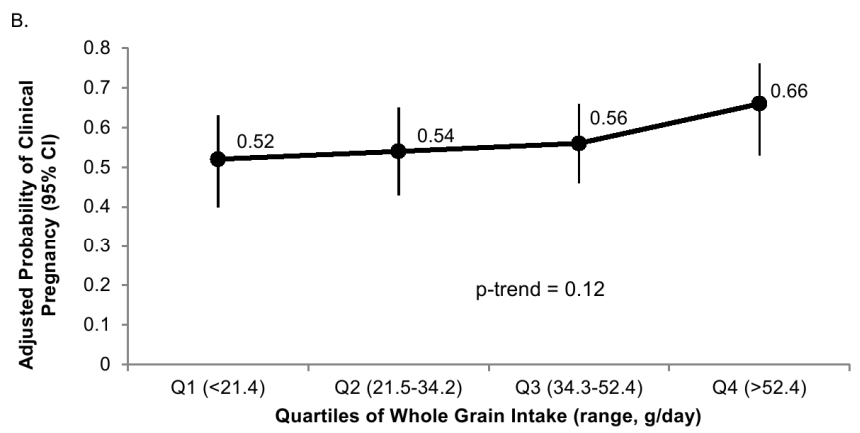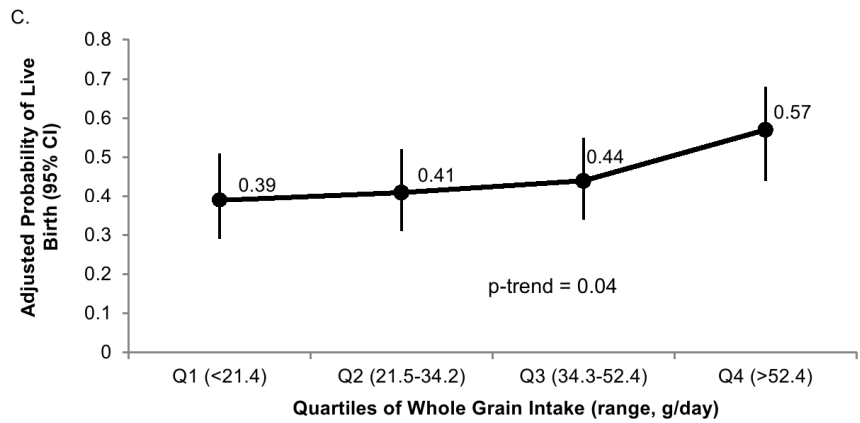

Supplement: NIHMS759029-supplement-01.pdf [file NIHMS759029-supplement-01.pdf]
